# Supplementary material
Source: PubMed Central journal article supplement (PMC4424019)
Supplement: supp_pp.114.256271_256271FigS1.pdf [file supp_pp.114.256271_256271FigS1.pdf]

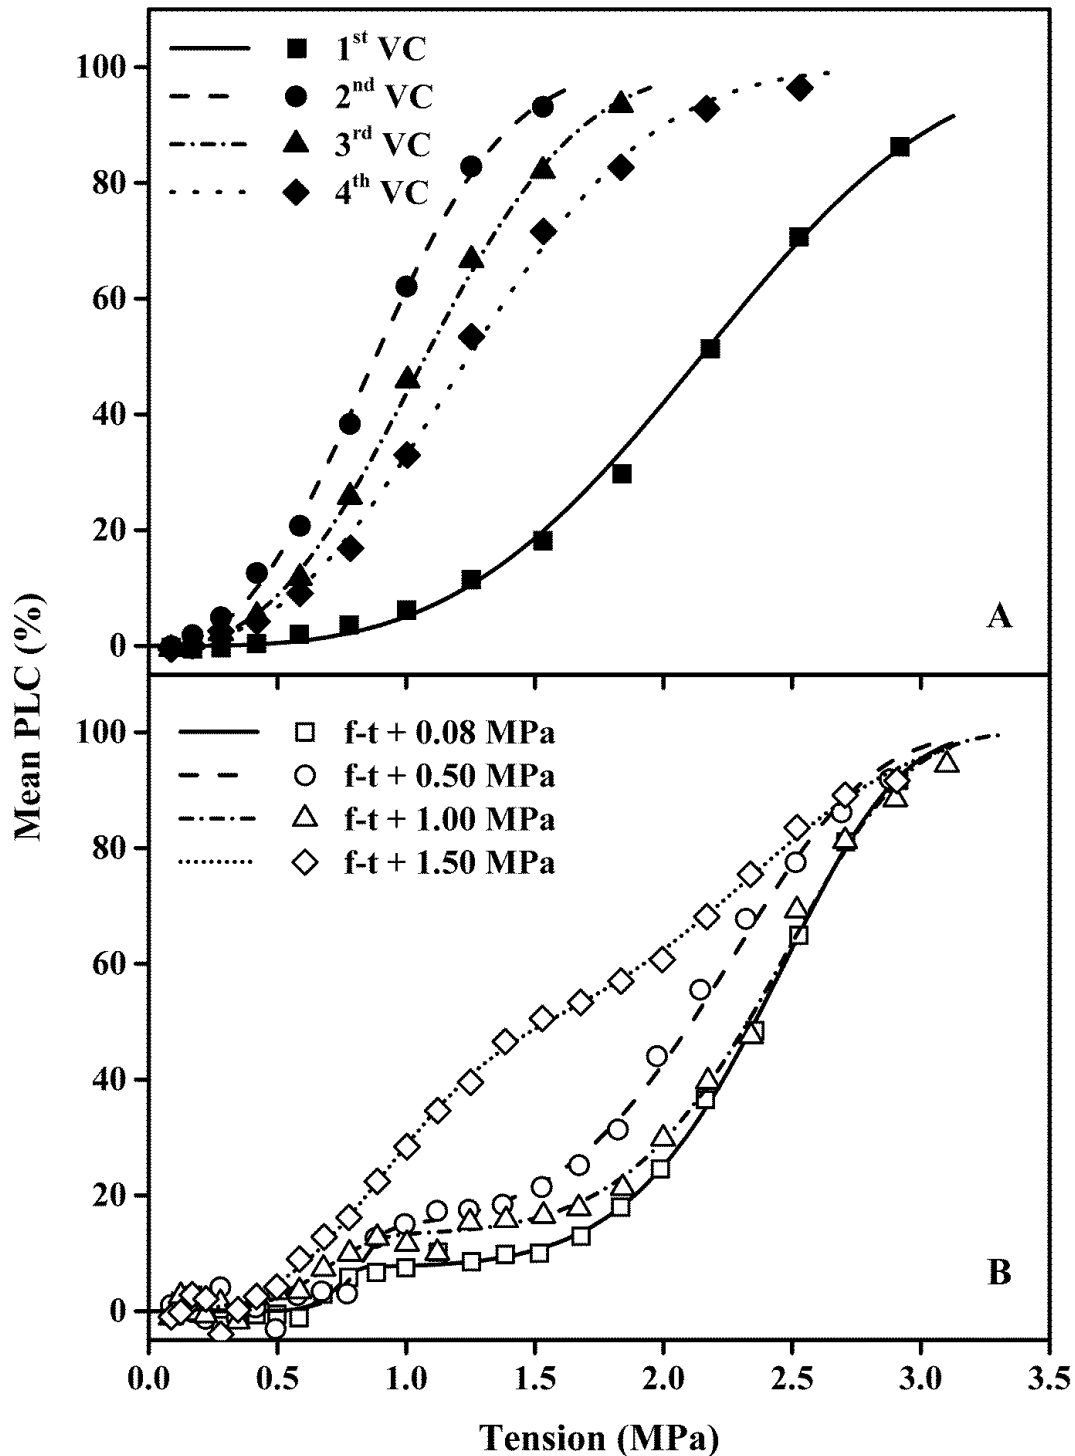

**Figure S1. Typical examples of “high resolution” VC curves with 9 to 27 points measured by Cochard rotor. A: Typical examples of VC curves with 9 to 13 points measured in cavitation-fatigue experiments. B: Typical examples of VC curves with 24 to 25 points measured after freeze-thaw treatment.**
